# Supplementary material for: A broad-applicability method for mercury speciation in various seafoods using microwave-assisted extraction and ion chromatography-inductively coupled plasma mass spectrometry
Source: Royal Society of Chemistry journal article supplement (doi:10.1039/d3ay00289f), 2023-01-01
Supplement: d3ay00289f1.pdf [file d3ay00289f1.pdf]

Electronic supplementary information for

**A broad-applicable method for mercury speciation in various seafood using  
microwave-assisted extraction and ion chromatography-inductively coupled  
plasma mass spectrometry**

Ruiling Li<sup>1</sup>, Yuquan Pan<sup>1</sup>, Chaochen Sun<sup>1</sup>, Chen Lin<sup>1</sup>, Shilong Chen<sup>1</sup>, Yongning Wu<sup>1</sup>,  
FengFu Fu<sup>1\*</sup>

<sup>1</sup>Key Laboratory for Analytical Science of Food Safety and Biology of MOE, Fujian  
Provincial Key Lab of Analysis and Detection for Food Safety, College of Chemistry,  
Fuzhou University, Fuzhou, Fujian 350116, China.

<sup>2</sup>NHC Key Lab of Food Safety Risk Assessment, Food Safety Research Unit  
(2019RU014) of China Academy of Medical Science, China National Center for Food  
Safety Risk Assessment, Beijing 100021, China

---

\* Corresponding author. Tel./Fax: +86-591-22866135; E-mail address: [fengfu@fzu.edu.cn](mailto:fengfu@fzu.edu.cn) (F.-F. Fu)

## 1. Chemicals, materials and apparatus used in the experiment

The standard solutions of  $\text{Hg}^{2+}$  (mercuric chloride, 1000  $\mu\text{g}/\text{mL}$ ),  $\text{CH}_3\text{Hg}^+$  (methylmercury chloride, 100  $\mu\text{g}/\text{mL}$ ) and  $\text{C}_2\text{H}_5\text{Hg}^+$  (ethylmercury chloride, 100  $\mu\text{g}/\text{mL}$ ) were all purchased from National Institute of Metrology, China (Beijing, China). The standards of each mercury species with different concentrations used in the experiments were prepared by directly diluted above standards with pure water. Ultra-pure  $\text{HNO}_3$  and analytical grade of L-Cysteine (Cys) were obtained from Sangon Biotech Co. Ltd (Shanghai, China). The water used in the experiment is Milli-Q water (18.2  $\text{M}\Omega\cdot\text{cm}$ ), which was prepared with Millipore pure system. Strong cation exchange guard column (Zorbax 300SCX, 4.6 $\times$ 12.5 mm) was purchased from Agilent Technology (Shanghai, China).

The IC-ICP-MS system, which couples an Agilent 7800 inductively coupled plasma mass spectrometry (ICP-MS, Agilent of USA) with a Dionex ICS-900 ion chromatography (ThermoFisher Scientific, China), was used in this study.

**Table S1:** Optimal running parameters of IC-ICP-MS system

| Parameter                           | Value                                                                   |
|-------------------------------------|-------------------------------------------------------------------------|
| <b>IC system</b>                    |                                                                         |
| IC separation column                | Two consecutive strong cation guard column (Zorbax 300SCX, 4.6×12.5 mm) |
| IC eluent                           | 5.0 mmol/L HNO <sub>3</sub> -1.0 mmol/L Cys                             |
| IC elution mode                     | iso-elution                                                             |
| Sample injection volume             | 10 µL                                                                   |
| Flow rate of IC eluent              | 1.0 mL/min                                                              |
| Temperature of IC separation column | 30 °C                                                                   |
| <b>ICP-MS system</b>                |                                                                         |
| ICP-MS RF power                     | 1350 W                                                                  |
| ICP-MS cool gas flow rate           | 15 L/min                                                                |
| ICP-MS auxiliary gas flow rate      | 0.90 L/min                                                              |
| ICP-MS nebulizer gas flow rate      | 0.80 L/min                                                              |
| ICP-MS makeup gas flow rate         | 0.20 L/min                                                              |
| Monitored isotope (m/z)             | <sup>202</sup> Hg                                                       |

**Table S2:** The effect of extracting solvent volume and extraction mode on mercury extraction efficiency of shellfish (*Morula uva*) sample

| Sample                    | 0.10 g shellfish ( <i>Morula uva</i> )                                         |                             |
|---------------------------|--------------------------------------------------------------------------------|-----------------------------|
| Extracting solvent volume | Extraction mode                                                                | Extraction efficiency of Hg |
| 8 mL                      | 4.0 mL for previous soaking and first extraction, 4.0 mL for second extraction | 72.4%                       |
| 10 mL                     | 5.0 mL for previous soaking and first extraction, 5.0 mL for second extraction | 83.6%                       |
| 12 mL                     | 6.0 mL for previous soaking and first extraction, 6.0 mL for second extraction | 89.8%                       |
|                           | 7.0 mL for previous soaking and first extraction, 5.0 mL for second extraction | 91.2%                       |
| 14 mL                     | 7.0 mL for previous soaking and first extraction, 7.0 mL for second extraction | 90.8%                       |
|                           | 8.0 mL for previous soaking and first extraction, 6.0 mL for second extraction | 91.5%                       |

**Table S3:** The comparison on analytical performance among previous ICP-MS-based methods for mercury speciation in seafood and our method

| Method                                 | Separation column             | Analyte                                                                                              | Extraction method                                                          | Applicable sample                                  | Instrument LOD    | Method LOD in seafood                                          | Ref.       |
|----------------------------------------|-------------------------------|------------------------------------------------------------------------------------------------------|----------------------------------------------------------------------------|----------------------------------------------------|-------------------|----------------------------------------------------------------|------------|
| HPLC-ICP-MS                            | C8 column                     | Hg <sup>2+</sup> and CH <sub>3</sub> Hg <sup>+</sup>                                                 | Enzymatic extraction and microwave-assisted extraction                     | Fish                                               | 0.4 ng/mL         | 10 ng/g dried weight                                           | 1          |
| Ion chromatography-ICP-MS              | Anion guard column            | Hg <sup>2+</sup> , CH <sub>3</sub> Hg <sup>+</sup> and C <sub>2</sub> H <sub>5</sub> Hg <sup>+</sup> | Ultrasonic extraction                                                      | Fish                                               | 0.008-0.029 ng/mL | Not provided                                                   | 2          |
| Ion-pairing reversed-phase HPLC-ICP-MS | C18 guard columns             | Hg <sup>2+</sup> , CH <sub>3</sub> Hg <sup>+</sup> and C <sub>2</sub> H <sub>5</sub> Hg <sup>+</sup> | Ultrasonic extraction                                                      | Fish                                               | 0.014-0.028 ng/mL | 0.18-0.33 ng/g fresh weight                                    | 3          |
| HPLC-ICP-MS                            | C18 column                    | Hg <sup>2+</sup> , CH <sub>3</sub> Hg <sup>+</sup> and C <sub>2</sub> H <sub>5</sub> Hg <sup>+</sup> | Ultrasonic extraction together with magnetic solid phase pre-concentration | Water and fish                                     | 0.49-0.76 ng/L    | Not provided                                                   | 4          |
| Ion chromatography-ICP-MS              | Cation guard columns          | Hg <sup>2+</sup> , CH <sub>3</sub> Hg <sup>+</sup> and C <sub>2</sub> H <sub>5</sub> Hg <sup>+</sup> | Ultrasonic extraction                                                      | Water and fish                                     | Not provided      | 1.9-3.1 ng/g fresh weight                                      | 5          |
| HPLC-ICP-MS                            | ZORBAX SB-Aq C18 column       | Hg <sup>2+</sup> and CH <sub>3</sub> Hg <sup>+</sup>                                                 | Microwave-assisted extraction with protease                                | Fish                                               | 0.013–0.015 ng/mL | Not provided                                                   | 6          |
| HPLC-isotope dilution ICP-MS           | Symmetry Shield RP C18 column | Hg <sup>2+</sup> and CH <sub>3</sub> Hg <sup>+</sup>                                                 | Microwave-assisted extraction                                              | Marine biota                                       | Not provided      | Not provided                                                   | 7          |
| IC-ICP-MS                              | Strong cation guard column    | Hg <sup>2+</sup> , CH <sub>3</sub> Hg <sup>+</sup> and C <sub>2</sub> H <sub>5</sub> Hg <sup>+</sup> | Microwave-assisted extraction without protease                             | Various seafood (seaweeds, fishes and shellfishes) | 0.02-0.05 ng/mL   | 2.4-6.0 ng/g dried weight (about 0.48 – 1.2 ng/g fresh weight) | This study |

**Reference:**

- (1) R. Jagtap, F. Krikowa, W. Maher, S. Foster, M. Ellwood, *Talanta*, 2011, 85, 49-55
- (2) X. P. Chen, C. Han, H. Y. Cheng, J. H. Liu, Z. G. Xu, X. F. Yin, *Anal. Chim. Acta*, 2013, 796, 7-13.
- (3) H. Y. Cheng, X. P. Chen, L. H. Shen, Y. C. Wang, Z. G. Xu, J. H. Liu, *J. Chromatogr. A*, 2018, 1531, 104-111.
- (4) S. Q. Zhu, B. B. Chen, M. He, T. Huang, B. Hu, *Talanta*, 2017, 171, 213-219.
- (5) X. P. Chen, C. Han, H. Y. Cheng, Y. C. Wang, J. H. Liu, Z. G. Xu, L. Hu, *J. Chromatogr. A*, 2013, 1314, 86-93.
- (6) Y.-C. Chen, S.-J. Jiang, *J. Anal. At. Spectrom.*, 2021, 36, 938-945.
- (7) A. A. Krata, E. Vassileva, *Talanta*, 2020, 217, 121113.

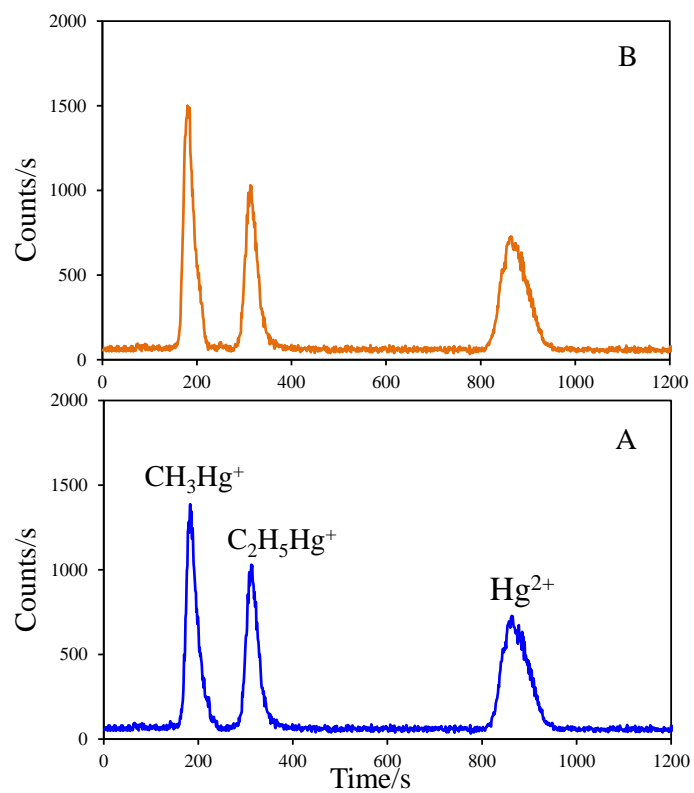

**Figure S1:** The IC-ICP-MS chromatograms of the mixed standard of mercury species. The concentrations of each mercury species are all 10.0 ng/mL. (A): Original mixed standard; (B) The mixed standard pretreated with pre-soaking microwave-assisted extraction.

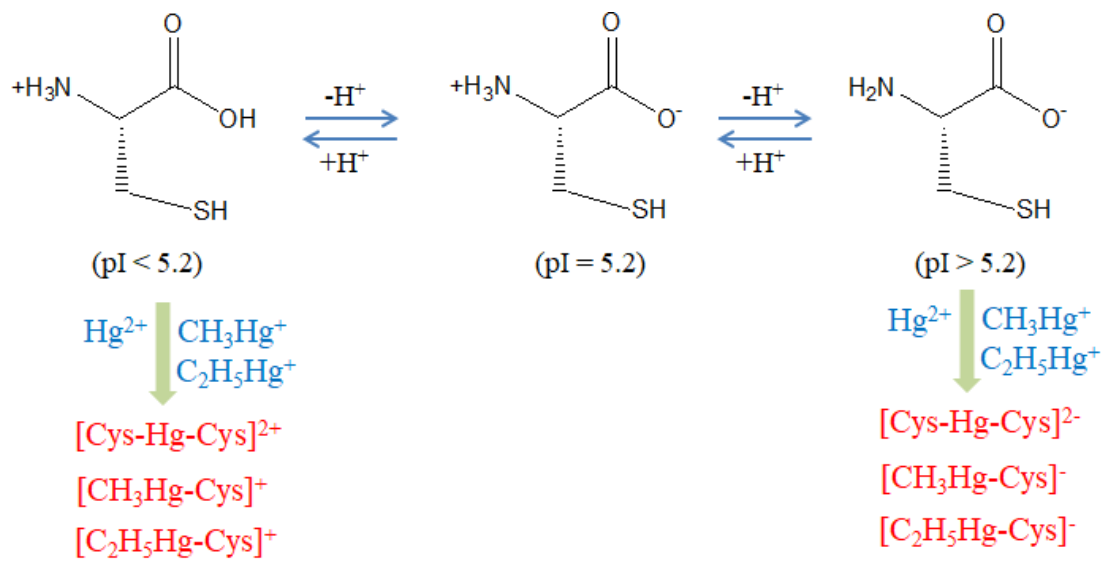

**Figure S2:** The structure and protonation state of Cys and the charge state of the Cys-mercury species complexes.

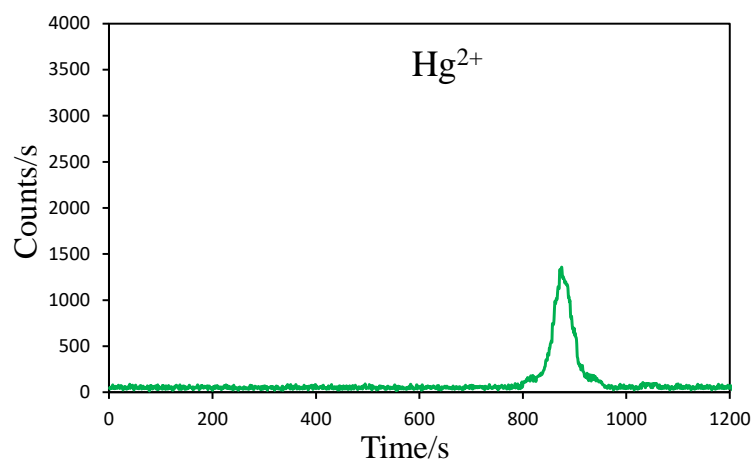

**Figure S3:** The IC-ICP-MS chromatogram for determining Hg<sup>2+</sup> after Hg<sup>2+</sup> was pre-chelated with 6.0 mM of L-Cys. The concentrations of Hg<sup>2+</sup> is 10 ng/mL, and the IC-ICP-MS chromatogram was obtained under Table S1 conditions.



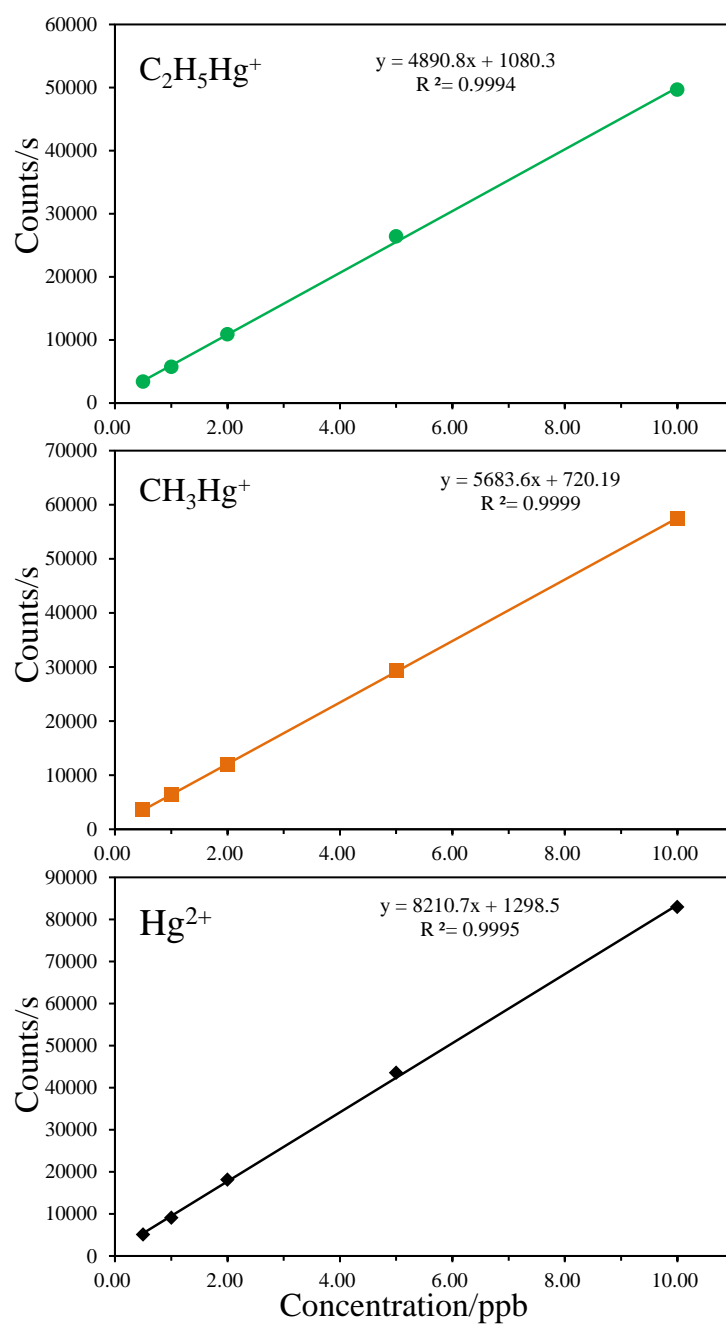

**Figure S4:** The linear relationship between IC-ICP-MS signal (peak area) and the concentrations of mercury species (calibration curves) for determining Hg<sup>2+</sup>, CH<sub>3</sub>Hg<sup>+</sup> and C<sub>2</sub>H<sub>5</sub>Hg<sup>+</sup> with IC-ICP-MS under Table S1 conditions.
